# Supplementary material for: The role of low-level clouds in the West African monsoon system
Source: Copernicus journal article supplement (doi:10.5194/acp-2018-743), 2018-09-13
Supplement: Supplementary file 1 [file acp-2018-743-supplement.pdf]

## S1 Supplementary Material

### S1.1 Temporal stability of opacity-induced effects

An additional aspect to be discussed is the response time of the atmospheric system to the imposed cloud modifications. To investigate this we use experiments, in which  $f_{op} = 0.1$  is applied as in EXPL for the first 4 days but then switched off for 6 more days of simulation time. Control runs with  $f_{op} = 1.0$  for all times were produced for comparison. As in EXPL, simulations were started every 4th day but run out to 10 days and two starting dates in August were added (3rd and 7th of August) to give better statistics for the time evolution. Figure S1 shows box-averaged 10-day time-series of  $RR$ , cover of low clouds  $CLC_{low}$  and that of high clouds  $CLC_{high}$  (below 800 hPa and above 400 hPa, respectively) for the DACCIWA region (Figs. S1a–c). The corresponding differences between the two sets of simulations are provided in the right-hand side panels of Fig. S1.

After the switch-off at 12 UTC on the fifth simulation day (i.e. after 96 hours), the differences in  $SSI$  and low-level  $T$  are reduced almost immediately (not shown), but for other variables the response is slower.  $RR$  shows the enhancement of afternoon and evening precipitation for  $f_{op} = 0.1$  as in EXPL (Figs. S1a and f). The enhancement is still fully visible for the first 14 hours after switch-off, indicating that the influence of the forcing during the morning hours is already enough to generate more instability and trigger more convection later in the day. After that, differences between the two runs become negligible. Before the switch in  $f_{op}$ ,  $CLC_{low}$  shows the familiar afternoon decrease and nighttime increase (Figs. S1b and g). On the day of the change, some signal remains until the morning of the following day, similar to  $RR$ . The small but on average slightly positive differences after that may be a reflection of increased surface fluxes after the strongly enhanced rainfall of the first five days.  $CLC_{high}$  (Figs. S1c and h) shows a considerably slower response. Differences between the two runs need one full diurnal cycle to establish and are then positive for the next three days. After the switch, there is a marked decrease in differences but then an overall tendency for relatively large values for two more days. This is consistent with Raymond et al. (2011), who show a considerably longer response time in the tropical upper troposphere than at low levels for a given perturbation.

Another interesting question is the impact on regions to the north, i.e. downstream of the DACCIWA box with respect to the monsoon flow. Figures S1d, e, i and j show corresponding plots for  $RR$  over the Sahelian regions 10–15°N and 15–20°N, both averaged over 8°W–8°E. For the former, again an initial response time of about one day is observed followed by a period of small positive differences. During the last five days of the simulation there is then no clear net difference between the two sets of experiments but much larger fluctuations. As these do not follow a strict diurnal cycle, we speculate that this is mostly a reflection of the overall chaotic nature of the atmosphere growing with leadtime. This conclusion is consistent with the similar behavior found for the 15–20°N band.

So in summary, this experiment shows that low-level variables such as  $SSI$  and  $T$  react almost immediately to changes in low cloud during the day. Low-level cloud cover and rainfall respond after one full diurnal cycle, while upper-level variables and neighboring regions show even longer responses but also increasingly chaotic behavior.

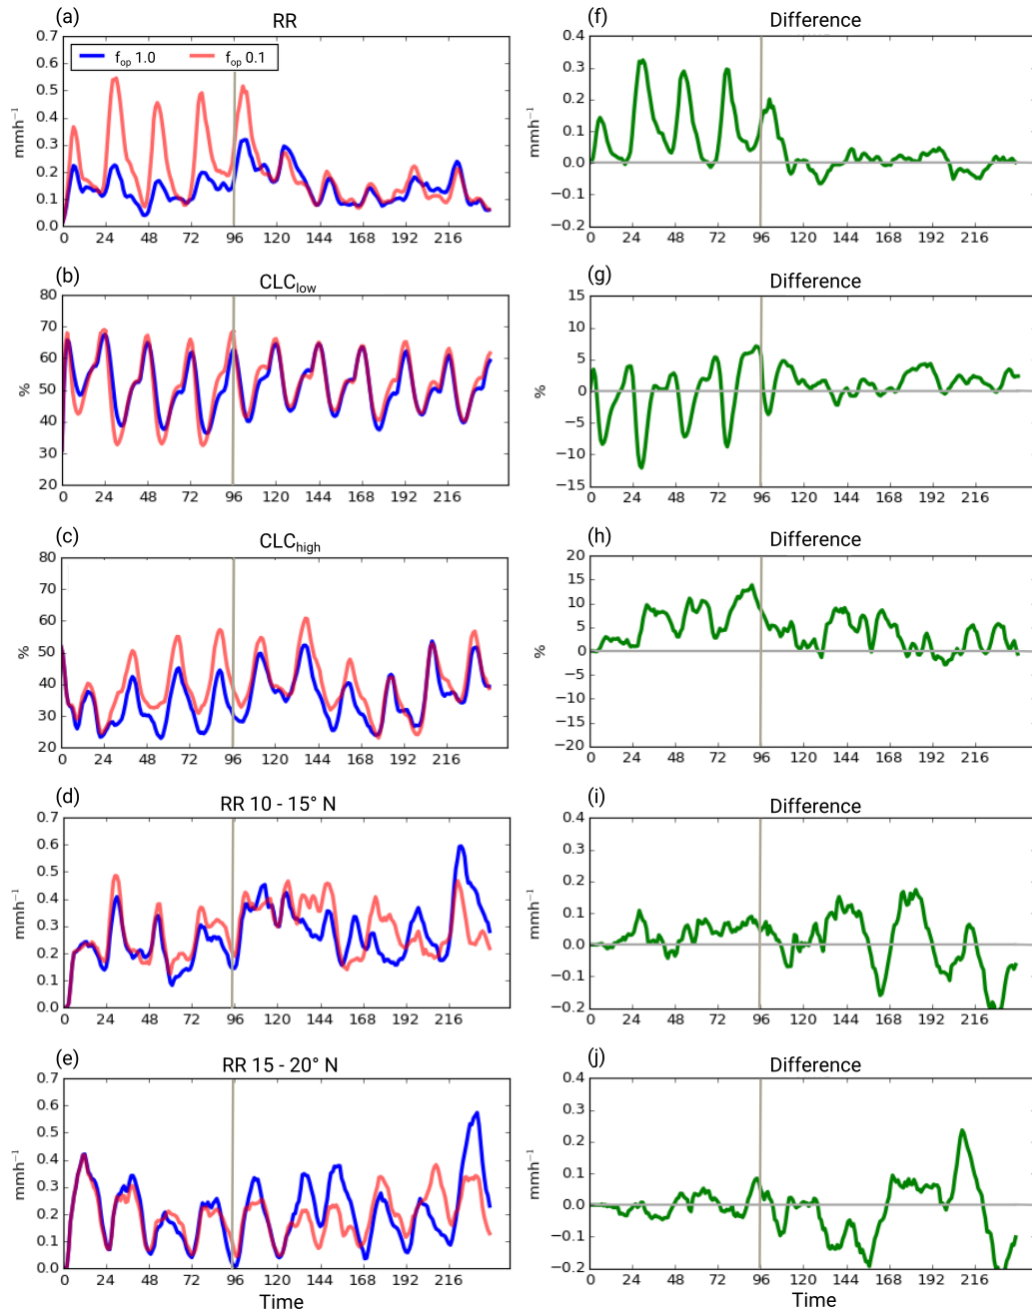

**Figure S1.** Time-series of  $RR$  (a),  $CLC_{low}$  (b) and  $CLC_{high}$  (c) of the experiments with  $f_{op} = 1.0$  all the time (blue line) and  $f_{op}$  switched from 0.1 to 1.0 after 96 hours (orange line). Results are averaged over the DACCIWA box, for all 10 runs in July-August 2006. (d) and (e) depict similar averages of  $RR$  but for the northern boxes  $15\text{--}20^\circ\text{N}$ ,  $8^\circ\text{W}\text{--}8^\circ\text{E}$  and  $15\text{--}20^\circ\text{N}$ ,  $8^\circ\text{W}\text{--}8^\circ\text{E}$ , respectively. The corresponding differences are shown as green lines in (f)–(j). Switch-off time is indicated by a grey line in all panels.

## S1.2 Table of acronyms

**Table S1.** Table of acronyms and abbreviations used in the main article.

| Acronym      | denotation                                                               |
|--------------|--------------------------------------------------------------------------|
| $\theta_e$   | equivalent potential temperature                                         |
| CALIPSO      | Cloud-Aerosol Lidar and Infrared Pathfinder Satellite Observation        |
| CERES        | Clouds and the Earth's Radiant Energy System                             |
| CM SAF       | Satellite Application Facility on Climate Monitoring                     |
| $CLC$        | cloud cover                                                              |
| $CLC_{low}$  | low-cloud cover                                                          |
| $CLC_{high}$ | high-cloud cover                                                         |
| CloudSat     | satellite in A-train with cloud profiling radar                          |
| COSMO model  | Consortium for Small-scale Modeling model                                |
| COSMO-EU     | regional COSMO model for Europe                                          |
| DACCIWA      | Dynamics-Aerosol-Chemistry-Cloud Interactions in West Africa project     |
| DWD          | German weather service                                                   |
| EBAF-Surface | Energy Balanced And Filled surface irradiance                            |
| EBAF-TOA     | Energy Balanced And Filled top of atmosphere irradiance                  |
| ECMWF        | European Centre for Medium-Range Weather Forecasts                       |
| ERA-I        | ERA Interim                                                              |
| EXPL         | experiment with explicit convection                                      |
| $f_{op}$     | opacity factor                                                           |
| GERB         | Geostationary Earth Radiation Budget                                     |
| GPCP         | Global Precipitation Climatology Project                                 |
| GPCC         | Global Precipitation Climatology Centre                                  |
| ICON         | Icosahedral Non-hydrostatic ( numerical weather prediction model of DWD) |
| IFS          | Integrated Forecasting System                                            |
| ITD          | Intertropical Discontinuity                                              |
| MODIS        | Moderate Resolution Imaging Spectroradiometer                            |
| MPI-M        | Max Planck Institute for Meteorology                                     |
| MVIRI        | Meteosat Visible and Infrared Imager                                     |
| NLLJ         | nocturnal low-level jet                                                  |
| NPP          | Suomi National Polar-orbiting Partnership                                |
| NWP          | numerical weather prediction                                             |
| $OLR$        | outgoing longwave radiation                                              |

| Acronym                           | denotation                                                              |
|-----------------------------------|-------------------------------------------------------------------------|
| <i>OSR</i>                        | outgoing shortwave radiation                                            |
| <i>p<sub>sf<sub>c</sub></sub></i> | surface pressure                                                        |
| PARAM                             | experiment with parameterised convection                                |
| PBL                               | planetary boundary layer                                                |
| <i>q<sub>c</sub></i>              | cloud liquid water content                                              |
| <i>q<sub>i</sub></i>              | cloud ice content                                                       |
| <i>q<sub>v</sub></i>              | specific humidity                                                       |
| <i>RH</i>                         | relative humidity                                                       |
| <i>RR</i>                         | precipitation rate                                                      |
| RRTM                              | Rapid Radiation Transfer Model                                          |
| SARAH                             | Surface Solar Radiation Data Set Heliosat                               |
| SEVIRI                            | Spinning Enhanced Visible and InfraRed Imager                           |
| SLEVE                             | smooth level vertical (coordinate)                                      |
| <i>SLI</i>                        | surface longwave irradiance                                             |
| SOCRATES                          | Suite Of Community RAdiative Transfer codes based on Edwards and Slingo |
| <i>SSI</i>                        | solar surface irradiance                                                |
| <i>SST</i>                        | sea surface temperature                                                 |
| SWA                               | southern West Africa                                                    |
| SWITCH                            | experiment where opacity factor is switched to 1 after some time        |
| <i>T</i>                          | temperature                                                             |
| TERRA                             | soil and vegetation model                                               |
| <i>TKE</i>                        | turbulent kinetic energy                                                |
| TMPA                              | TRMM Multisatellite Precipitation Analysis                              |
| TOA                               | top of atmosphere                                                       |
| TRMM                              | Tropical Rainfall Measuring Mission                                     |
| <i>v<sub>horiz</sub></i>          | horizontal wind speed                                                   |
| WAM                               | West African monsoon                                                    |
